# Supplementary material for: Paradigm Shift in Treatment Strategies for Second-Degree Burns Using a Caprolactone Dressing (Suprathel®)? A 15-Year Pediatric Burn Center Experience in 2084 Patients
Source: MDPI journal article supplement (doi:10.3390/ebj3010001), 2021-12-23
Supplement: s1 [file s1]

### Supplementary Files:

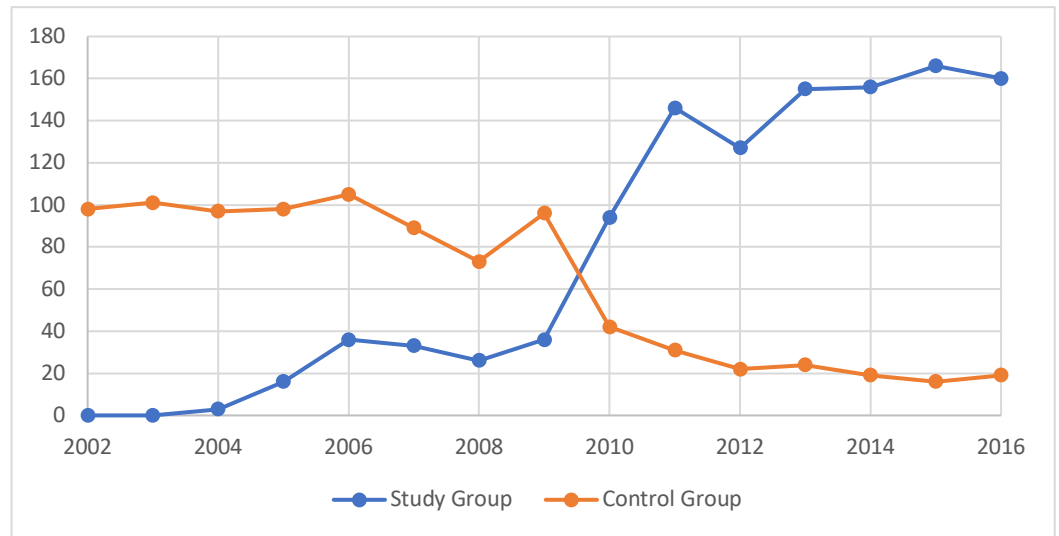

**Figure S1:** Retrospective annual distribution of patients between study and control group

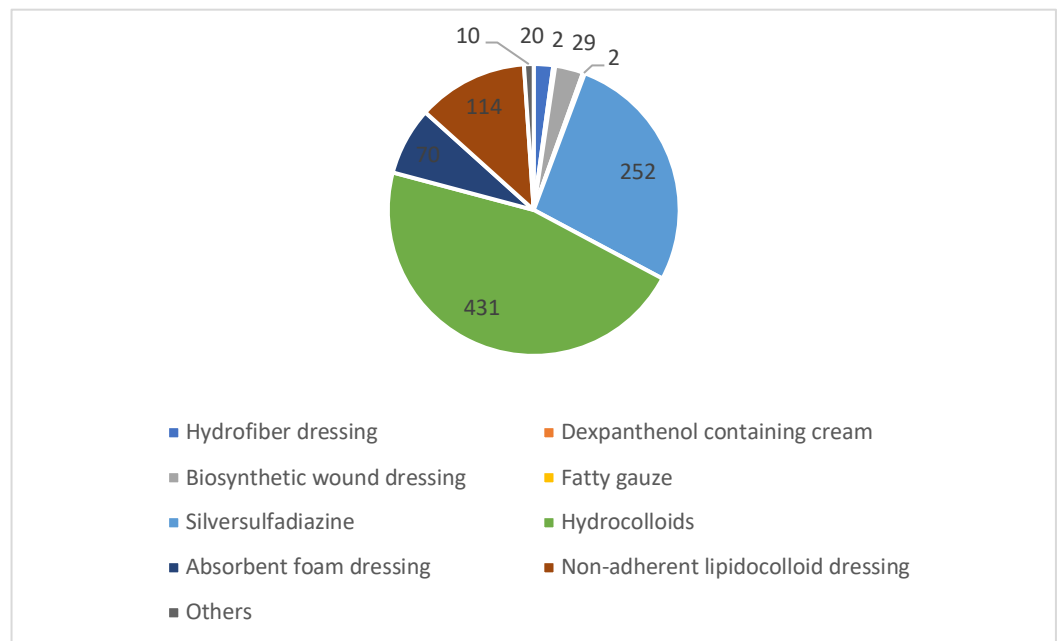

**Figure S2:** Number of alternative dressing materials and ointment use in the entire control group of patients not receiving Caprolactone (n = 390)
